# Supplementary material for: A threshold analysis assessed the credibility of conclusions from network meta-analysis
Source: PubMed Central journal article supplement (PMC5176010; doi:10.1016/j.jclinepi.2016.07.003), 2016-12
Supplement: mmc1.pdf [file mmc1.pdf]

## SUPPLEMENTARY MATERIALS:

### Threshold analysis to assess the credibility of conclusions from network meta-analysis

#### 1. WinBUGS code for the base-case 2-stage NMA

The base-case two-stage analysis is as follows. The input data are the summary relative effects based on separate meta-analyses of each of the pair-wise contrasts. The weight-loss and osteoporosis datasets appear below

```
model {
  # base case analysis
  d[1] <- 0
  for (k in 2:NT) { d[k] ~ dnorm(0,0.0001) } # priors for NT-1 basic parameters
  for (c in 1:(NT-1)) { for (k in (c+1): NT) { delta[c,k] <- d[k] - d[c] } # model the NT*(NT-1)/2 contrasts
  for (i in 1:N) { D[i] ~ dnorm(delta[b[i],t[i]],P[i]) } # likelihood
  dev[i] <- P[i] * pow((D[i]-delta[b[i],t[i]]),2) } # deviance
  sumdev <- sum(dev[]) # summed deviance
}
```

#### #Weight-loss pair-wise inputs

```
list(NT=5,N=10)
```

| t[] | b[] | D[]  | P[]         |
|-----|-----|------|-------------|
| 2   | 1   | 3.67 | 0.067482887 |
| 3   | 1   | 4.84 | 0.941476326 |
| 4   | 1   | 9.34 | 0.932223543 |
| 5   | 1   | 5.97 | 0.2455948   |
| 3   | 2   | 0.21 | 0.163653229 |
| 4   | 2   | 1.23 | 0.642620263 |
| 5   | 2   | 4.00 | 0.216744433 |
| 4   | 3   | 1.07 | 4.690455114 |
| 5   | 3   | 1.84 | 4.960743802 |
| 5   | 4   | 0.33 | 2.712802768 |

#### # Osteoporosis pair-wise inputs

```
list(NT=11,N=16)
```

| t[] | b[] | D[]          | P[]         |
|-----|-----|--------------|-------------|
| 4   | 1   | -0.174353387 | 45.01633091 |
| 6   | 1   | -1.771956842 | 2.522590727 |
| 9   | 1   | 0.223143551  | 22.0379046  |
| 10  | 1   | -0.186329578 | 204.8442346 |
| 10  | 2   | 0.693147181  | 1.941911284 |
| 10  | 3   | 0.512823626  | 16.21606951 |
| 8   | 4   | -0.713349888 | 0.63623121  |
| 10  | 4   | -0.127833372 | 12.5819449  |
| 10  | 5   | 0.494696242  | 39.17395115 |
| 10  | 6   | 0.652325186  | 5.6818392   |
| 10  | 7   | 0.542324291  | 5.837103216 |
| 9   | 8   | 1.30833282   | 3.102469721 |
| 10  | 8   | 0.463734016  | 20.65927709 |
| 11  | 8   | 1.515127233  | 0.705485428 |
| 10  | 9   | 0.029558802  | 22.99615142 |
| 11  | 10  | 0.19062036   | 39.54633397 |

## 2. Threshold analysis

The threshold analysis is achieved by the following code, using the same datasets as above, but replacing the “list” input by, for example, `list(NT=5,N=10, Nstep=10, K=9, inc=0.5)` for the weight loss data. This will have the effect of carrying out a threshold analysis on data element 9, in 10 steps of 0.5 kg each above, and 10 steps below, the original data for the weight loss data.

```
model {
  # threshold analysis
  for (h in 1: (2*Nstep +1) ) { # loop over h = 2*Nstep+1 settings of bias in pooled
    summary K
    d[h,1] <- 0
    for (k in 2:NT) { d[h,k] ~ dnorm(0,0.0001) } # priors for NT-1 basic parameters
    for (c in 1:(NT-1)) { for (k in (c+1): NT) { dd[h,c,k] <- d[h,k] - d[h,c] }} # model the NT*(NT-1)/2

    DH[h,K] <- D[K] + (h-Nstep-1) *inc # construct alternative datasets DH[h,] from data D[]
    for (i in 1:(K-1)) { DH[h,i] <- D[i] } # except for data element D[K] set the rest of DH[h,] to D[]
    for (i in (K+1):N) { DH[h,i] <- D[i] } # ditto

    for (i in 1:N) { DH[h,i] ~ dnorm(dd[h,b[i],t[i]],P[i]) # likelihood
      dev[h,i] <- P[i] * pow((DH[h,i]-dd[h,b[i],t[i]]),2) } # deviance
    sumdev[h] <- sum(dev[h,]) # summed deviance
  } # end loop h
}
```

## 3: Comparisons of original one-stage NMA and two-stage NMA

For the weight loss network we compare the two-stage analysis used as our base case with the one-stage Bayesian NMA as reported (Table S1). Both analyses would lead to the same treatment recommendation (Low Fat) although there are noticeable differences between the two NMAs

For the osteoporosis data we compare the results as reported for the original one-stage Bayesian random effects NMA (Table S2 columns 7,8,9) with two forms of two-stage NMA . The first, used in the paper, is based on the separate pair-wise summaries reported in the original publication (Table 2 columns 1,2,3). The second (Table 2 columns 4,5,6) is based on the output from Bayesian random effects meta-analysis of each of the separate pair-wise contrasts subject to the restriction that they all share the same between-trials variance [1]. This analysis requires the same original trial-level data that is used as input to a one-stage NMA. The effect is to stabilise the variances of each contrast. In addition the posterior correlations between-treatment effects in multi-arm trials, is carried through to the second stage. The 2<sup>nd</sup>-stage NMA (not shown here) is modified to take account of the correlation structure

The results (Table S2 columns 4,5,6) show that the alternative two-stage analysis with stabilised variances and correlations produces results that are virtually indistinguishable from a standard one-stage Bayesian NMA.

Our interpretation of this is that, if a two stage approach is to be used for threshold analysis, the stabilised variance and correlations approach is preferable, as the base-case results will be very much closer to the results of the one-stage NMA on which recommendations will be based.

**Table S1.** Comparison of two-stage NMA starting from crude pair-wise summaries, and one-stage Bayesian RE NMA for the branded weight loss programs [2]

| Treatment | Two-Stage analysis |                    |      | Original one-stage analysis |      |
|-----------|--------------------|--------------------|------|-----------------------------|------|
|           | Pr(Best)           | Mean kg difference | SD   | Mean kg difference          | SD   |
| No diet   | 0                  | (reference)        | -    | (reference)                 |      |
| LEARN     | 0.01               | 5.56               | 1.16 | 5.16                        | 1.26 |
| Moderate  | 0                  | 6.09               | 0.72 | 5.70                        | 0.81 |
| Low CHO   | 0.17               | 7.49               | 0.72 | 7.25                        | 0.99 |
| Low Fat   | 0.82               | 7.88               | 0.76 | 7.27                        | 1.04 |

**Table S2.** Comparing the two stage base case analysis for osteoporosis with a modified two stage NMA with stabilised variances and incorporating correlations, and the original one stage analysis as published by Murad *et al.* [3] [4]

| Treatment    | Two-Stage analysis based on pair-wise summaries |       |      | Two stage analysis with stabilised variance and correlations |       |      | Original one-stage analysis (as published) |       |      |
|--------------|-------------------------------------------------|-------|------|--------------------------------------------------------------|-------|------|--------------------------------------------|-------|------|
|              | Pr(Best)                                        | LOR   | SD   | Pr(Best)                                                     | LOR   | SD   | Pr(Best)                                   | LOR   | SD   |
| Placebo      | 0                                               | -     | -    | 0.00                                                         | -     | -    | 0.00                                       | -     | -    |
| Teriparatide | 0.32                                            | -0.87 | 0.72 | 0.41                                                         | -0.89 | 0.76 | 0.42                                       | -0.87 | 0.74 |
| Denosumab    | 0.04                                            | -0.69 | 0.26 | 0.12                                                         | -0.74 | 0.30 | 0.13                                       | -0.69 | 0.30 |
| Raloxifene   | 0.00                                            | -0.15 | 0.13 | 0.00                                                         | -0.13 | 0.17 | 0.00                                       | -0.14 | 0.17 |
| Zoledronate  | 0.02                                            | -0.68 | 0.17 | 0.05                                                         | -0.70 | 0.20 | 0.05                                       | -0.69 | 0.19 |
| Risedronate  | 0.45                                            | -1.12 | 0.35 | 0.07                                                         | -0.74 | 0.19 | 0.06                                       | -0.73 | 0.19 |
| Ibandronate  | 0.12                                            | -0.72 | 0.42 | 0.20                                                         | -0.75 | 0.45 | 0.21                                       | -0.71 | 0.44 |
| Alendronate  | 0.05                                            | -0.75 | 0.21 | 0.15                                                         | -0.83 | 0.23 | 0.14                                       | -0.80 | 0.24 |
| VitD         | 0.00                                            | 0.04  | 0.15 | 0.00                                                         | 0.12  | 0.09 | 0.00                                       | 0.12  | 0.09 |
| VitD+Calcium | 0.00                                            | -0.18 | 0.07 | 0.00                                                         | -0.22 | 0.09 | 0.00                                       | -0.21 | 0.09 |
| Calcium      | 0.00                                            | 0.02  | 0.17 | 0.00                                                         | 0.15  | 0.18 | 0.00                                       | 0.13  | 0.17 |

1. Dias, S., et al., *NICE DSU Technical Support Document 4: Inconsistency in networks of evidence based on randomised controlled trials*, in *Technical Support Document*. 2011.
2. Johnston, B.C., et al., *Comparison of weight loss among named diet programs in overweight and obese adults: A meta-analysis*. *JAMA*, 2014. **312**(9): p. 923-933.
3. Murad, M.H., et al., *Comparative Effectiveness of Drug Treatments to Prevent Fragility Fractures: A Systematic Review and Network Meta-Analysis*. *The Journal of Clinical Endocrinology & Metabolism*, 2012. **97**(6): p. 1871-1880.
4. Puhan, M.A., et al., *A GRADE Working Group approach for rating the quality of treatment effect estimates from network meta-analysis*. *BMJ*, 2014. **349**: p. g5630.
